# Supplementary material
Source: Elsevier journal article supplement (https://www.sciencedirect.com/science/article/pii/S0187893X1630057X)
Supplement: mmc1 [file S0187893X1630057X:mmc1.docx]

**MATERIAL SUPLEMENTAR**

**N-ARILAÇÃO DO IMIDAZOL VIA CuI: UM TUTORIAL PARA OTIMIZAÇÃO DE UM SISTEMA CATALÍTICO ATRAVÉS DO PLANEJAMENTO EXPERIMENTAL**

Para a confirmação do produto do acoplamento N-C, 1-(4-metilfenil)-1H-imidazol, o espectro de massas (CG-EM) do sólido isolado é mostrado abaixo.


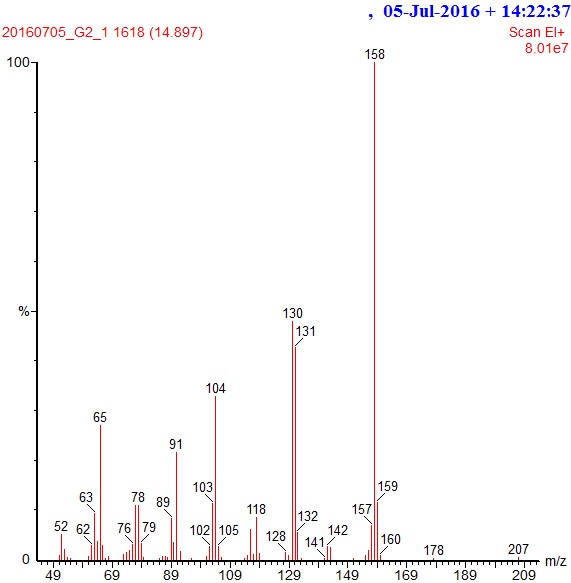


**Figura 1S.** *Espectro de massas do produto obtido do acoplamento N-C entre imidazol e 4-iodotolueno*

Na sequência são apresentadas as Figuras 2S e 3S relativas às telas geradas pelo *software* Excel.


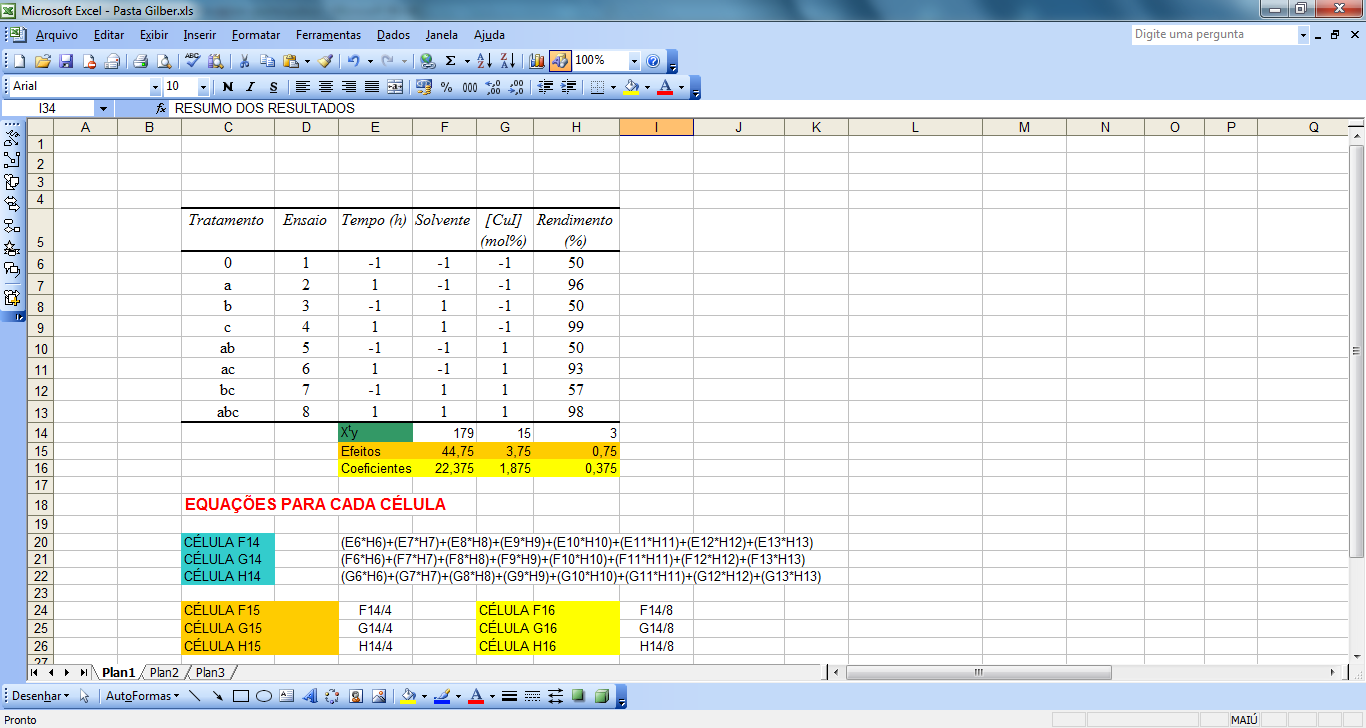


**Figura 1S.** *Planilha do software Excel com os cálculos dos efeitos (Equação 5 a 7) e coeficientes do modelo empírico*


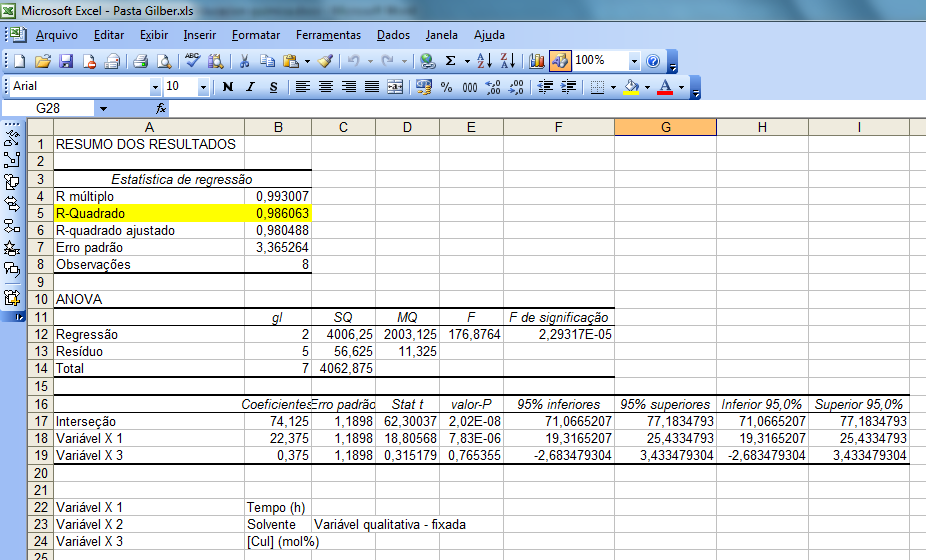


**Figura 2S.** *Ferramentas de análise de dados do software Excel para obtenção da ANOVA, determinação dos coeficientes do modelo empírico e seus respectivos índices estatísticos*
